# Supplementary material for: DOM quality in a peatland and forest headwater stream: seasonal and event characteristics
Source: Copernicus journal article supplement (doi:10.5194/hess-2016-377), 2016-08-30
Supplement: Supplementary file 1 [file hess-2016-377-supplement.pdf]

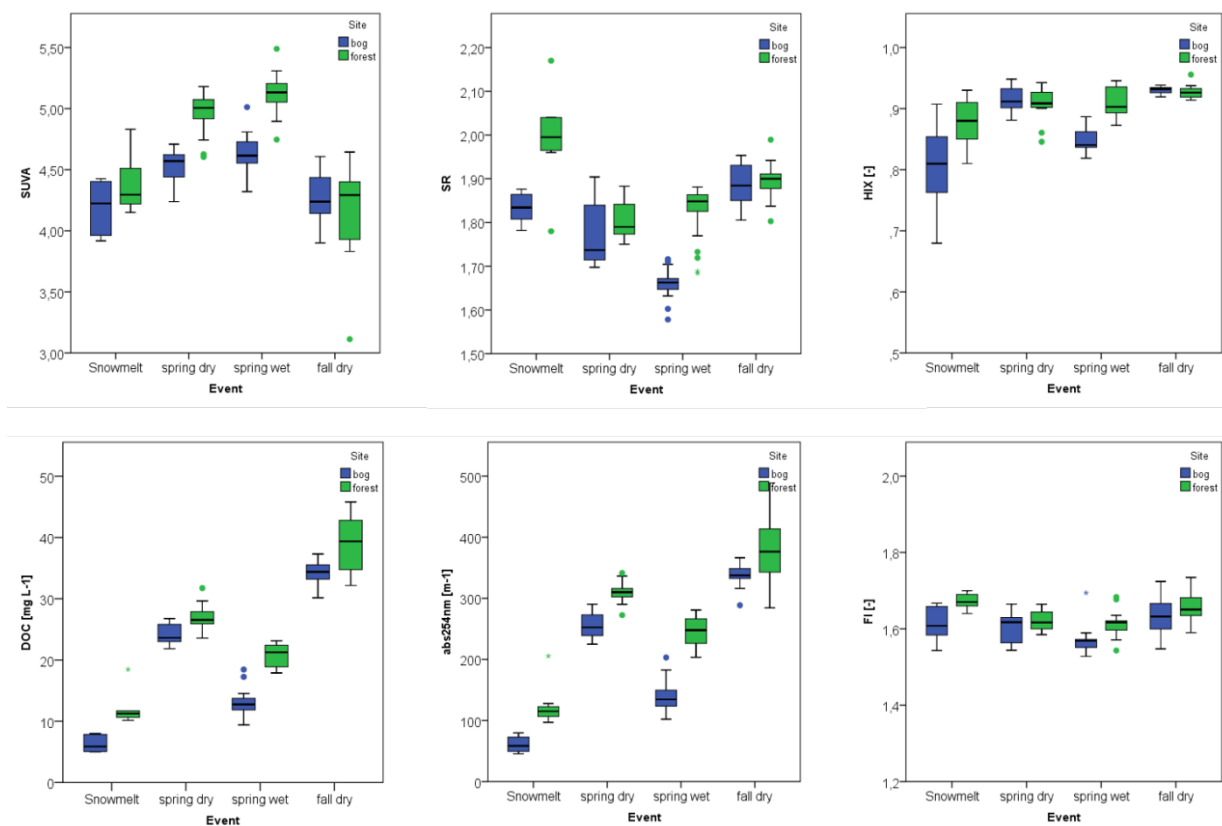

**Figure S1: Box plots of SUVA,  $S_R$ , HIX, DOC concentrations,  $abs_{254nm}$  and FI during events. Blue bars indicate the bog site, green bars the forested site.**

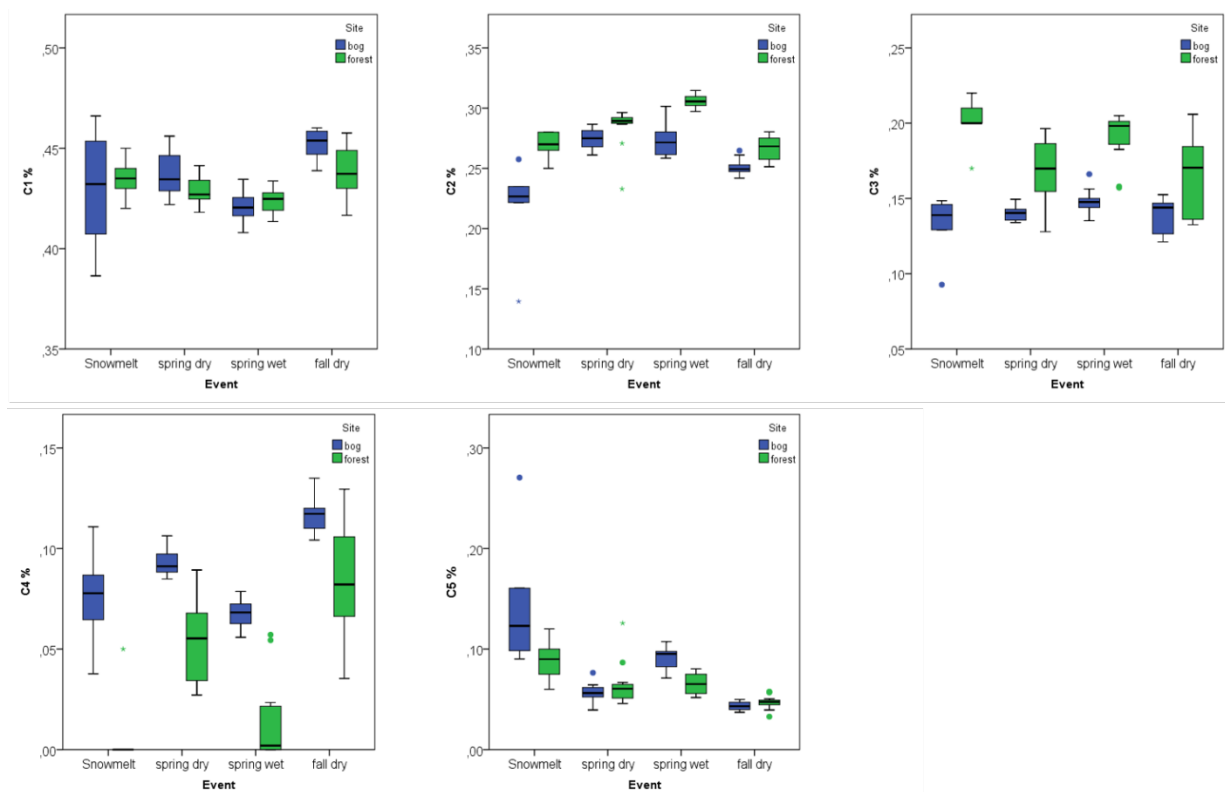

**Figure S2: Box plots of PARAFAC components during events. Blue bars indicate the bog site, green bars the forested site.**
